# Supplementary material
Source: PubMed Central journal article supplement (PMC11102857)
Supplement: NIHMS1988055-supplement-Supplementary_Table_1.pdf [file NIHMS1988055-supplement-Supplementary_Table_1.pdf]

# Unsupervised discovery of tissue architecture in multiplexed imaging

---

In the format provided by the authors and unedited

**Extended Data Table 1:** Summary of features of existing methods for detection of higher-order tissue patterns. UTAG requires less input compared to similar methods as it does not require cell type annotation, and allows joint inference of microanatomical domains across slides. This also reduces the burden of result interpretation required from the user (domain interpretation only once for the entire dataset instead of for each slide).

| Method        | Underlying model                                         | Resolution               | Cell type annotation | Application unit                     | Programming language |
|---------------|----------------------------------------------------------|--------------------------|----------------------|--------------------------------------|----------------------|
| UTAG          | Graph (Message Passing) + Clustering                     | Single cell              | Not required         | <b>Across slides &amp; Per slide</b> | Python               |
| SpatialLDA    | Graph (Niche distribution) + Latent Dirichlet Allocation | Single cell              | Required             | <b>Across slides &amp; Per slide</b> | Python               |
| SpaGene       | Graph Permutation + Non-negative Matrix Factorization    | Single cell              | Not required         | Per slide                            | R                    |
| HMRF (Giotto) | Hidden Markov Random Field                               | Single cell & Spot Based | Not required         | Per slide                            | R                    |
| BayesSpace    | Bayesian Hidden Markov Random Field                      | Spot Based               | Not Applicable       | Per slide                            | R                    |
| SpaGCN        | Graph Convolutional Neural Network                       | Single cell & Spot Based | Not required         | Per slide                            | Python               |
